# Supplementary material
Source: publisher figshare collection journal article supplement (https://diabetesjournals.figshare.com/ndownloader/files/27455507)
Supplement: Supplementary file 1 [file 27455507]

|    |                                                                                                  |             |
|----|--------------------------------------------------------------------------------------------------|-------------|
| 1  | <b>Hemodialysis-related Glycemic Disarrays Proven by Continuous Glucose Monitoring; Glycemic</b> |             |
| 2  | <b>markers and Hypoglycemia.</b>                                                                 |             |
| 3  |                                                                                                  |             |
| 4  | <b>Supplementary Appendix</b>                                                                    |             |
| 5  | <b>Table of content</b>                                                                          |             |
| 6  | <b>List of Principal Investigators.</b>                                                          | <b>p. 2</b> |
| 7  | <b>Supplementary Figure S1.</b>                                                                  | <b>p. 3</b> |
| 8  | <b>Supplementary Figure S2.</b>                                                                  | <b>p. 4</b> |
| 9  | <b>Supplementary Figure S3.</b>                                                                  | <b>p. 5</b> |
| 10 | <b>Supplementary Table S1.</b>                                                                   | <b>p. 6</b> |
| 11 |                                                                                                  |             |

# 1 List of Principal Investigators.

|                    |                                                                                                                                                                             |
|--------------------|-----------------------------------------------------------------------------------------------------------------------------------------------------------------------------|
| Akinori Hayashi    | -Department of Laboratory Medicine, Kitasato University School of Medicine<br>-Department of Endocrinology, Diabetes and Metabolism, Kitasato University School of Medicine |
| Naoya Shimizu      | -Department of Endocrinology, Diabetes and Metabolism, Kitasato University School of Medicine                                                                               |
| Agena Suzuki       | -Department of Endocrinology, Diabetes and Metabolism, Kitasato University School of Medicine                                                                               |
| Kenta Matoba       | -Department of Endocrinology, Diabetes and Metabolism, Kitasato University School of Medicine                                                                               |
| Akari Momozono     | -Department of Endocrinology, Diabetes and Metabolism, Kitasato University School of Medicine                                                                               |
| Tsuguto Masaki     | -Department of Endocrinology, Diabetes and Metabolism, Kitasato University School of Medicine                                                                               |
| Akifumi Ogawa      | -Department of Endocrinology, Diabetes and Metabolism, Kitasato University School of Medicine                                                                               |
| Ibuki Moriguchi    | -Sohbudai Nieren Clinic                                                                                                                                                     |
| Koji Takano        | -Department of Endocrinology, Diabetes and Metabolism, Kitasato University School of Medicine                                                                               |
| Naoyuki Kobayashi  | -Sohbudai Nieren Clinic                                                                                                                                                     |
| Masayoshi Shichiri | -Department of Endocrinology, Diabetes and Metabolism, Kitasato University School of Medicine                                                                               |

2

3

**Supplementary Figure S1.** Time-resolved glucose monitoring during the 5 hours following the start of HD in groups that used dialysates with different glucose concentrations. Mean  $\pm$  SD sensor glucose levels during and immediately after HD, using dialysate solutions containing 100 mg/dL (A), 125 mg/dL (B), or 150 mg/dL (C) glucose. All the patients underwent HD for 4 h and ate within 0.5–1 h of the end of HD.

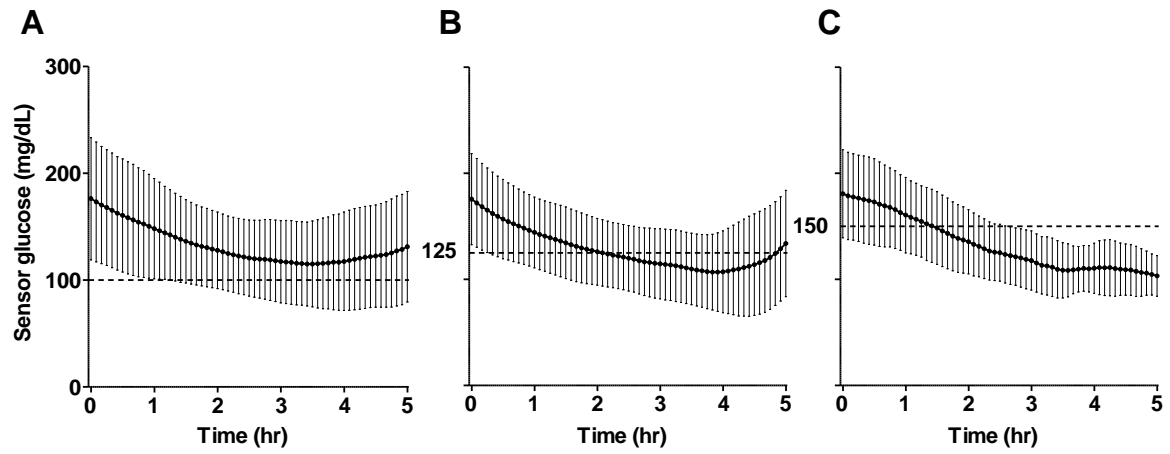

**Supplementary Figure S2.** Difference of glycemic profiles on HD day among patients undergoing HD in the morning, the afternoon and night. Mean  $\pm$  SD sensor glucose levels over 24-h on an HD day in 82 patients undergoing HD in the morning (A) and in 11 in the afternoon (B) and 5 in night.

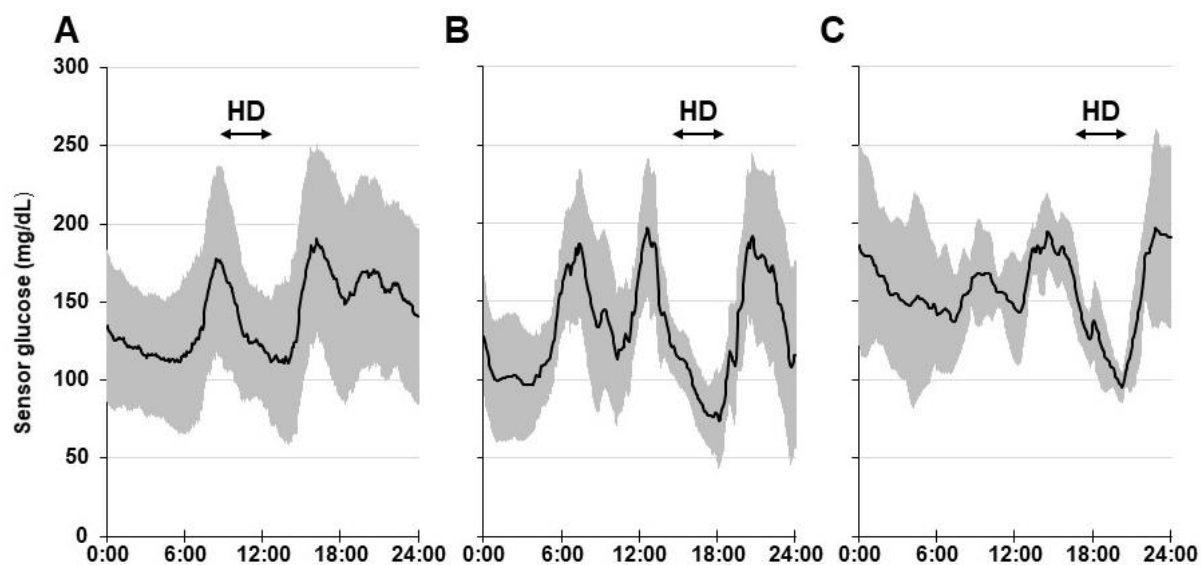

**Supplementary Figure S3.** Mean  $\pm$  SD sensor glucose levels over 24-h on non-HD day in 21 patients who showed HD-related hypoglycemia (A) and in 77 participants who did not (B).

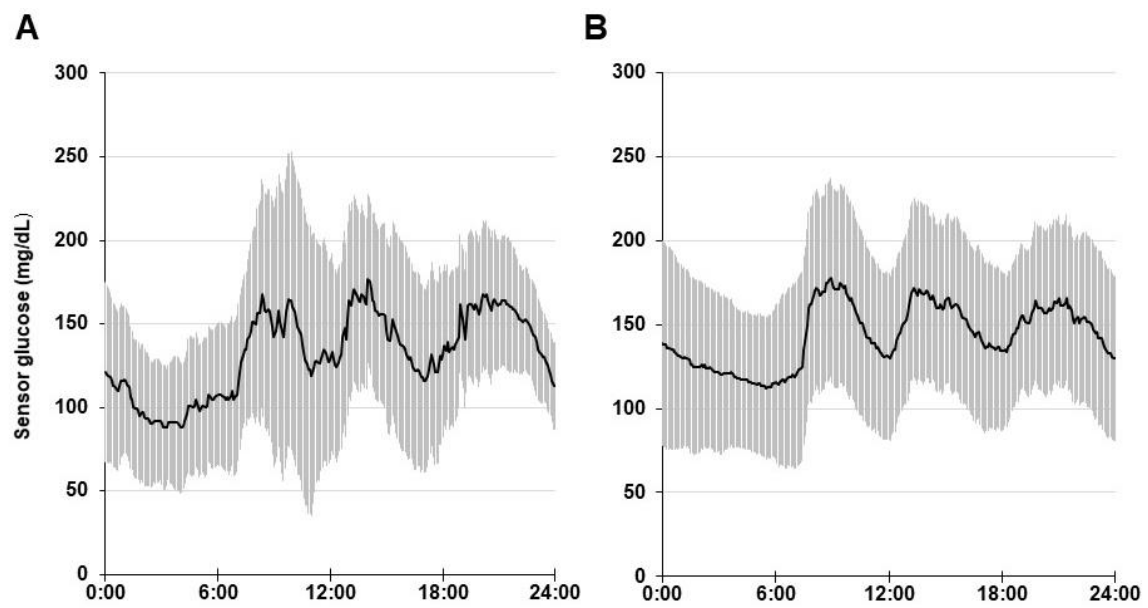

1 **Supplement Table S1. Univariate and multivariate correlation analysis for 48-h glycemic profile markers.**

| Factors           | Parameters                         | Univariate  |                   | Multivariate   |              |              |                   |
|-------------------|------------------------------------|-------------|-------------------|----------------|--------------|--------------|-------------------|
|                   |                                    | R           | P                 | r <sup>2</sup> | $\beta$      | F            | P                 |
| Mean SGL (mg/dL)  | Sex, male/female                   | 0.003       | 0.9784            |                |              |              |                   |
|                   | Age (years)                        | -0.02       | 0.8310            |                |              |              |                   |
|                   | Body mass index                    | 0.17        | 0.1025            |                |              |              |                   |
|                   | Duration of diabetes (years)*      | <b>0.23</b> | <b>0.0235</b>     | 0.57           | -0.02        | 0.11         | 0.7374            |
|                   | Duration of hemodialysis (months)* | -0.0006     | 0.9955            |                |              |              |                   |
|                   | HbA1c (%)                          | <b>0.69</b> | <b>&lt;0.0001</b> | <b>0.48</b>    | <b>1.49</b>  | <b>30.26</b> | <b>&lt;0.0001</b> |
|                   | GA (%)                             | <b>0.53</b> | <b>&lt;0.0001</b> | <b>0.57</b>    | <b>-1.37</b> | <b>9.11</b>  | <b>0.0033</b>     |
|                   | GA/HbA1c ratio                     | <b>0.20</b> | <b>0.0435</b>     | <b>0.53</b>    | <b>1.34</b>  | <b>12.61</b> | <b>0.0006</b>     |
|                   | Casual CPR (ng/mL)*                | -0.10       | 0.4105            |                |              |              |                   |
| SD of SGL (mg/dL) | Sex, male/female                   | 0.09        | 0.4076            |                |              |              |                   |
|                   | Age (years)                        | 0.09        | 0.3744            |                |              |              |                   |
|                   | Body mass index                    | -0.04       | 0.7136            |                |              |              |                   |
|                   | Duration of diabetes (years)*      | 0.15        | 0.1386            |                |              |              |                   |
|                   | Duration of hemodialysis (months)* | -0.07       | 0.5052            |                |              |              |                   |
|                   | HbA1c (%)                          | <b>0.51</b> | <b>&lt;0.0001</b> | <b>0.35</b>    | <b>0.37</b>  | <b>9.15</b>  | <b>0.0032</b>     |
|                   | GA (%)                             | <b>0.53</b> | <b>&lt;0.0001</b> | <b>0.29</b>    | <b>0.24</b>  | <b>13.41</b> | <b>&lt;0.0001</b> |
|                   | GA/HbA1c ratio                     | <b>0.29</b> | <b>0.0035</b>     | 0.35           | 0.10         | 0.05         | 0.8220            |
|                   | Casual CPR (ng/mL)*                | 0.04        | 0.7222            |                |              |              |                   |
| %CV of SGL (%)    | Sex, male/female                   | 0.12        | 0.2308            |                |              |              |                   |
|                   | Age (years)                        | 0.10        | 0.3236            |                |              |              |                   |
|                   | Body mass index                    | -0.15       | 0.1545            |                |              |              |                   |
|                   | Duration of diabetes (years)*      | 0.05        | 0.6597            |                |              |              |                   |
|                   | Duration of hemodialysis (months)* | -0.10       | 0.3328            |                |              |              |                   |
|                   | HbA1c (%)                          | 0.08        | 0.4559            |                |              |              |                   |

|                     |             |               |             |             |             |               |
|---------------------|-------------|---------------|-------------|-------------|-------------|---------------|
| GA (%)              | <b>0.23</b> | <b>0.0207</b> | <b>0.05</b> | <b>0.21</b> | <b>5.54</b> | <b>0.0207</b> |
| GA/HbA1c ratio      | <b>0.20</b> | <b>0.0487</b> | 0.05        | 0.03        | 0.04        | 0.8445        |
| Casual CPR (ng/mL)* | 0.20        | 0.0929        |             |             |             |               |

- 1 Univariate, linear regression analysis; Multivariate, stepwised multivariate analysis.
- 2 SGL, sensor glucose level; GA, glycated albumin; GA/HbA1c ratio, GA to HbA1c (%) ratio; CPR, C-peptide immunoreactivity; SD, standard deviation; %CV, coefficient of
- 3 variation.
